# Supplementary material for: Tuning Structural, Electronic, and Magnetic Properties of C Sites Vacancy Defects in Graphene/MoS2 van der Waals Heterostructure Materials: A First-Principles Study
Source: Hindawi journal article supplement (doi:10.1155/2020/8850701), 2020-11-28
Supplement: f1 [file 8850701.f1.docx]

**Tuning structural, electronic and magnetic properties of C sites vacancy defects in Graphene/MoS2 van der Waals heterostructure materials: A first-principles study**

**Supplementary Information (SI)**

**Additional tables and figures:**

**Table-S1: The inter-atomic distances measurement of HS-G/MoS2 and C sites vacancy defects in HS-G/MoS2 geometries, where (S-S), (Mo-Mo), (C-C) respectively represent inter-atomic distance between two Sulpher atoms in MoS2, two Molybdenum atoms, two Carbon atoms in Graphene.**

| Inter-atomic distances of HS-G/MoS2  along x, y and z axis | x-axis  (Ǻ) | y-axis  (Ǻ) | z-axis  (Ǻ) |
| --- | --- | --- | --- |
| S-S | 0.00 | 0.00 | 3.14 |
| Mo-Mo | 1.59 | 2.75 | 0.00 |
| Mo-S | 1.54 | 0.92 | 1.57 |
| C-C | 0.00 | 1.39 | 0.09 |

| Inter-atomic distances of C sites vacancy defects in HS-G/MoS2 along x, y and z axis | x-axis (Ǻ) | | | | y-axis (Ǻ) | | | | z-axis (Ǻ) | | | |
| --- | --- | --- | --- | --- | --- | --- | --- | --- | --- | --- | --- | --- |
| 2C | C-1C | R-1C | L-1C | 2C | C-1C | R-1C | L-1C | 2C | C-1C | R-1C | L-1C |
| S–S | 0.00 | 0.00 | 0.00 | 0.00 | 0.00 | 0.00 | 0.00 | 0.00 | 3.14 | 3.14 | 3.14 | 3.14 |
| Mo-Mo | 1.59 | 1.59 | 1.59 | 1.59 | 2.75 | 2.75 | 2.75 | 2.75 | 0.00 | 0.00 | 0.00 | 0.00 |
| Mo-S | 1.53 | 1.54 | 1.54 | 1.54 | 0.92 | 0.92 | 0.92 | 0.92 | 1.57 | 1.57 | 1.57 | 1.57 |
| C-C | 0.00 | 0.00 | 0.00 | 0.00 | 1.38 | 1.39 | 1.39 | 1.39 | 0.09 | 0.09 | 0.09 | 0.09 |

**Table-S2: Magnetic values generated by total and individual spin up and spin down electrons orbital of C, Mo and S atoms in pure and C sites vacancy defects (HS) G/MoS2 geometries from PDOS analysis.**

| Magnetism developed by electrons spins of C, Mo, S atoms in HS-G/MoS2 and C sites vacancy defects in HS-G/MoS2 materials | 2C atoms  (µB/cell) | C-1C atom (µB/cell) | L-1C atom (µB/cell) | R-1C atom (µB/cell) | G/MoS2  (µB/cell) |
| --- | --- | --- | --- | --- | --- |
| Total orbital of C atoms (spin up-spin down) | 0.39 | -0.12 | -0.75 | -0.75 | 0.00 |
| Total orbital of Mo atoms (spin up-spin down) | 0.00 | 0.00 | 0.00 | 0.00 | 0.00 |
| Total orbital of S atoms (spin up-spin down) | 0.00 | 0.00 | 0.00 | 0.00 | 0.00 |
| Total spin up s, p orbitals of C atoms | 59.32 | 61.19 | 60.72 | 60.73 | 63.25 |
| Total spin down s, p orbitals of C atoms | 58.93 | 61.31 | 61.47 | 61.48 | 63.25 |
| Total spin up s, p, d orbitals of Mo atoms | 64.89 | 64.89 | 64.89 | 64.89 | 64.89 |
| Total spin down s, p, d orbitals of Mo atoms | 64.89 | 64.89 | 64.89 | 64.89 | 64.89 |
| Total spin up s, p orbitals of S atoms | 51.52 | 51.52 | 51.27 | 51.52 | 51.52 |
| Total spin down s, p orbitals of  S atoms | 51.52 | 51.52 | 51.28 | 51.52 | 51.52 |
| 2s orbital of C atoms | 0.07 | -0.07 | -0.23 | -0.24 | 0.00 |
| 2p orbital of C atoms | 0.31 | -0.05 | -0.52 | -0.51 | 0.00 |
| 4p orbital of Mo atoms | 0.00 | 0.00 | 0.00 | 0.00 | 0.00 |
| 4d orbital of Mo atoms | 0.00 | 0.00 | 0.00 | 0.00 | 0.00 |
| 5s orbital of Mo atoms | 0.00 | 0.00 | 0.00 | 0.00 | 0.00 |
| 3s orbital of S atoms | 0.00 | 0.00 | 0.00 | 0.00 | 0.00 |
| 3p orbital of S atoms | 0.00 | 0.00 | 0.00 | 0.01 | 0.00 |
| Total value of magnetic moment | 0.39 | -0.12 | -0.75 | -0.75 | 0.00 |


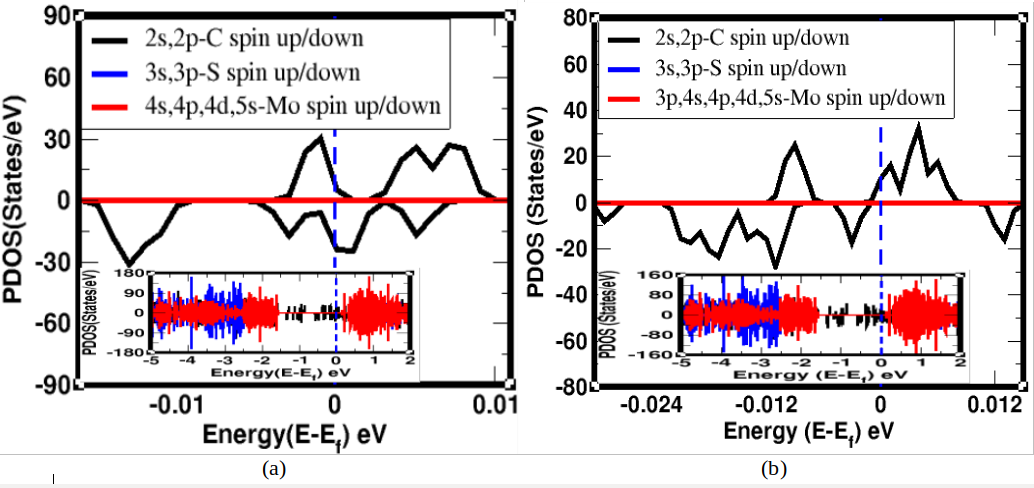

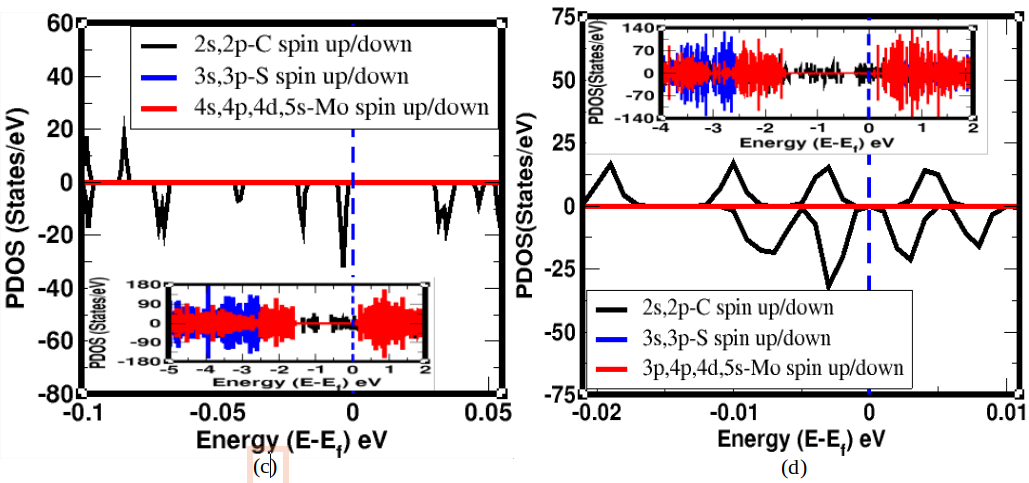


**Figure-S1: (a) PDOS plot of total spin up & spin down electrons orbital of all atoms in R-1C atom vacancy defects HS-G/MoS2 (b) PDOS plot of total spin up & spin down electrons orbital of all atoms in L-1C atom vacancy defects HS-G/MoS2 (c) PDOS plot of total spin up & spin down electrons orbital of all atoms in C-1C atom vacancy defects HS-G/MoS2 (d) PDOS plot of total spin up & spin down electrons orbital of all atoms in 2C atom vacancy defects HS-G/MoS2. Where, the states above the horizontal line represent spin up electrons and a state below the horizontal line represents spin down electrons**
